# Supplementary material for: Yoda1 Enhanced Low-Magnitude High-Frequency Vibration on Osteocytes in Regulation of MDA-MB-231 Breast Cancer Cell Migration
Source: MDPI journal article supplement (doi:10.3390/cancers14143395), 2022-07-13
Supplement: s1 [file s1]

## Yoda1 Enhanced Low-Magnitude High-Frequency Vibration on Osteocytes in Regulation of MDA-MB-231 Breast Cancer Cell Migration

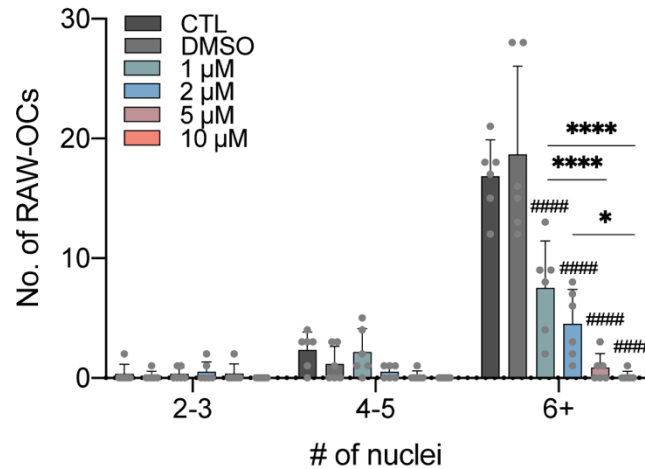

**Figure S1.** Number of TRAP-positive RAW-OCs with 2-3, 4-5, or more than 6 nuclei after 7-day incubation in medium (Control), DMSO, or dose-dependent Yoda1 supplemented with 20 ng/ml RANKL ( $n = 6$ ). \*\*\*\* $P < 0.0001$ , \* $P < 0.05$ ; #### $P < 0.0001$  in comparison to DMSO control.

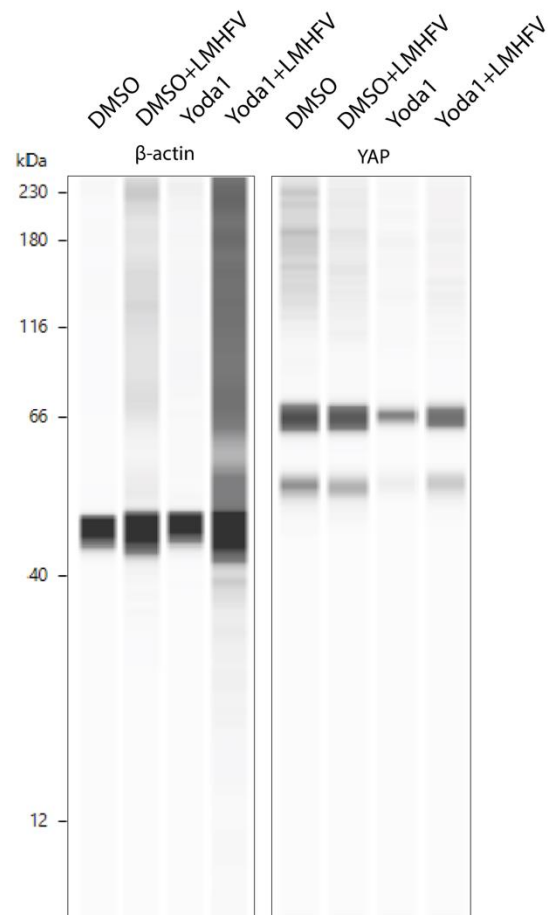

**Figure S2.** Immunoblotting showed that combined treatment decreases the expression of cytoplasmic YAP protein in MLO-Y4. The uncropped images include all bands and molecular weight markers for (A) YAP protein and (B) β-actin in Fig 4A .

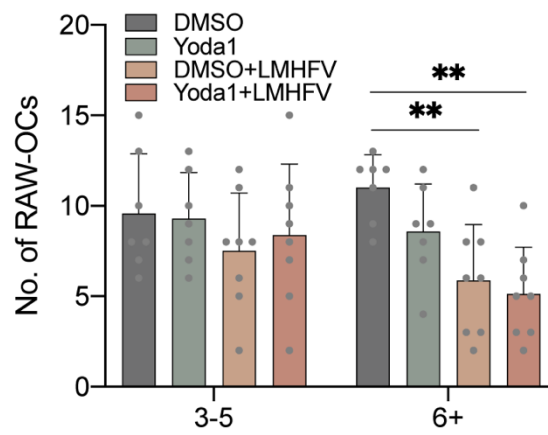

**Figure S3.** Number of TRAP-positive RAW-OCs with 3-5 and more than 6 nuclei after 5-day differentiation under 50% CM from MLO-Y4 stimulated with DMSO, monotreatments, or combined treatment and 50% growth medium supplemented with 20 ng/ml RANKL ( $n=7-8$ ). \*\*\* $P<0.01$ .

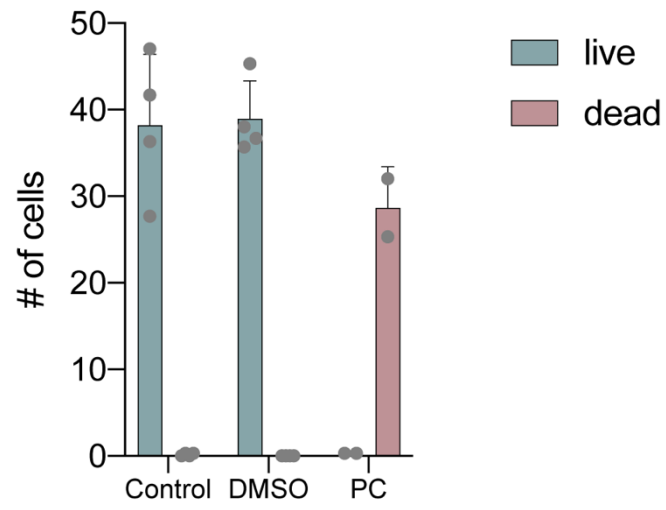

**Figure S4.** Live-dead measurements of MLO-Y4 under growth medium (control) or 0.1% (v/v) DMSO for 48 h (n=4). PC: Positive control.
